# Supplementary material for: Validation of reference genes for quantitative expression analysis by real-time RT-PCR in Saccharomyces cerevisiae
Source: PubMed Central journal article supplement (PMC2776018; doi:10.1186/1471-2199-10-99), 2009-10-30

WT

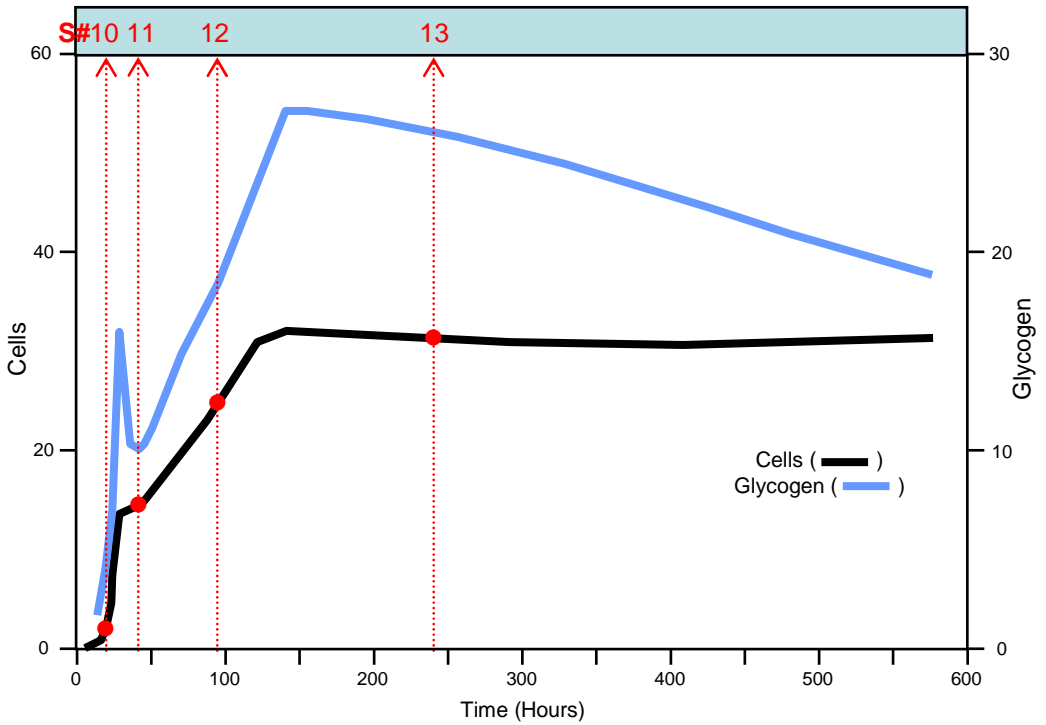

*tps1*

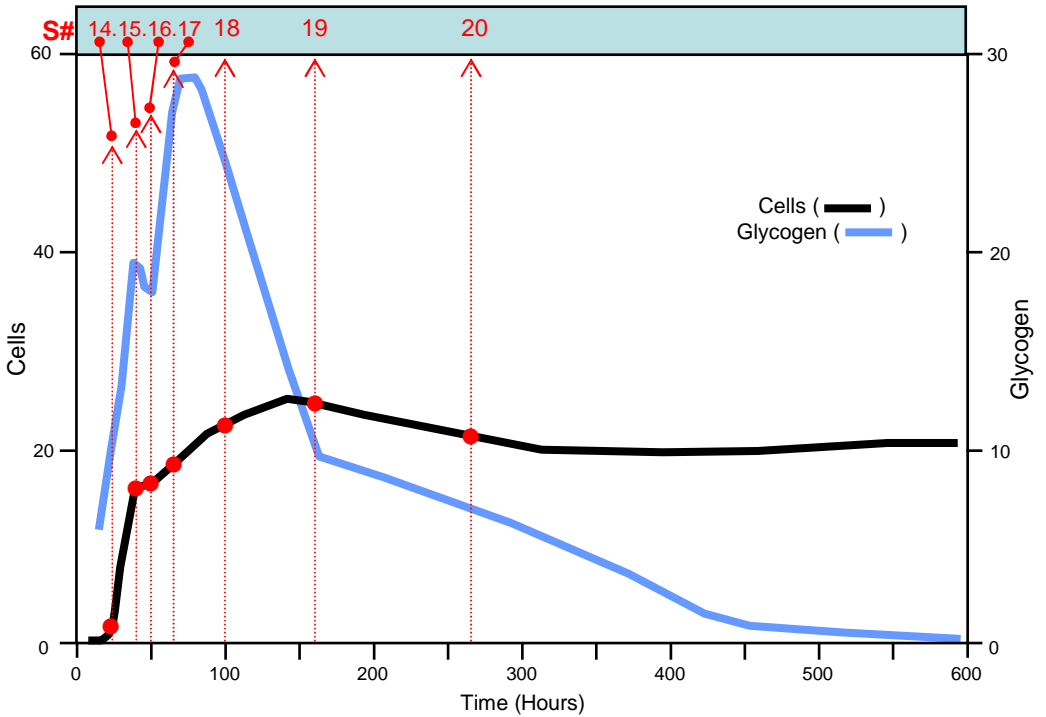

Supplement: 1471-2199-10-99-S2.pdf [file 1471-2199-10-99-S2.pdf]
